# Supplementary material for: Organic calcium silicate hydrate hybrids: a new approach to cement based nanocomposites
Source: Royal Society of Chemistry journal article supplement (doi:10.1039/b515947d), 2006-01-01
Supplement: b515947d.pdf [file b515947d.pdf]

## Supplementary data

### Organic Calcium Silicate Hydrate Hybrids: a New Approach to Cement Based

#### Nanocomposites

*Jérôme Minet,<sup>a</sup> Sébastien Abramson,<sup>b</sup> Bruno Bresson,<sup>c</sup> Alexandre Franceschini,<sup>a</sup> Henri Van Damme<sup>a</sup> and Nicolas Lequeux\*<sup>a</sup>*

*<sup>a</sup>Laboratoire de Physicochimie des Polymères et Milieux Dispersés, UMR7615-CNRS, Ecole Supérieure de Physique et de Chimie Industrielles, 10 rue Vauquelin, 75005 Paris, France.  
E.mail: [nicolas.lequeux@espci.fr](mailto:nicolas.lequeux@espci.fr) ; Fax: (0) 1 40 79 46 40 ; Tel: (0) 1 40 79 46 43*

*<sup>b</sup>Laboratoire Colloïdes et Matériaux Divisés, UMR7612-CNRS, Ecole Supérieure de Physique et de Chimie Industrielles, 10 rue Vauquelin, 75005 Paris, France.*

*<sup>c</sup>Laboratoire de Physique Quantique, UPR5-CNRS, Ecole Supérieure de Physique et de Chimie Industrielles, 10 rue Vauquelin, 75005 Paris, France.*

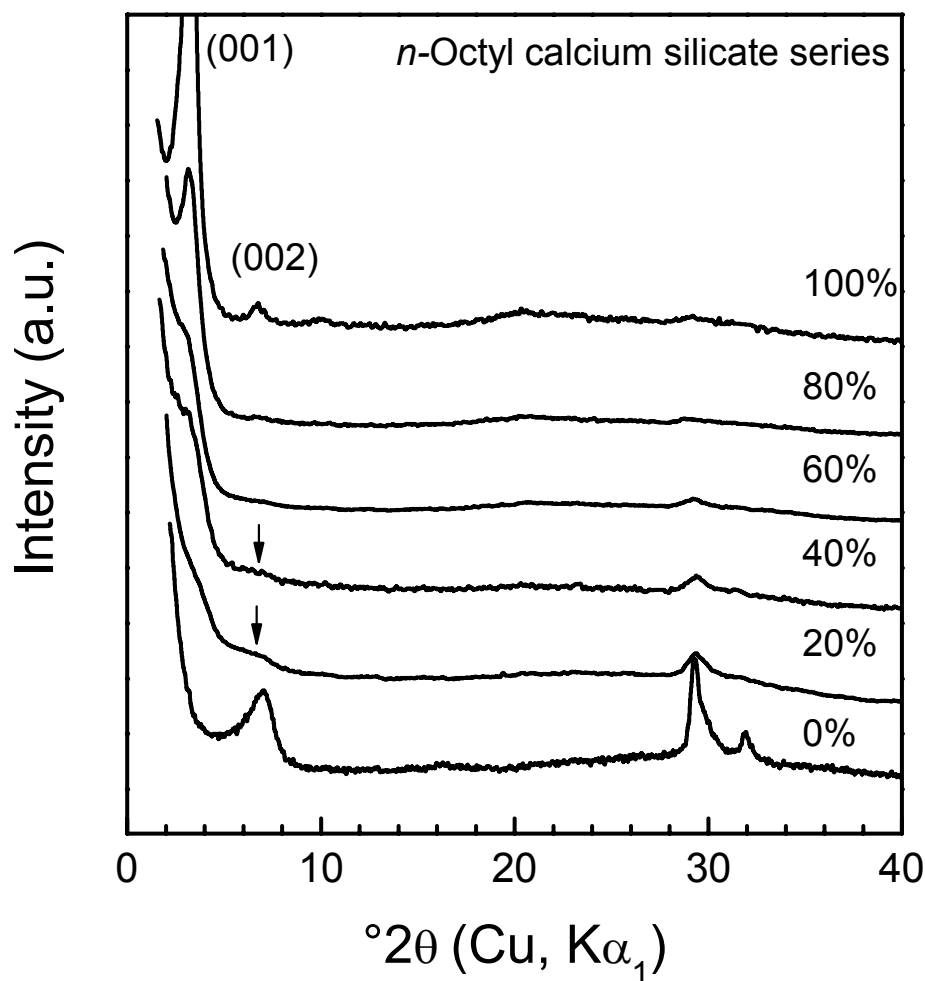

**Figure S1** XRD diagrams of *n*-octyl calcium silicate hybrid series. For each spectrum, the fraction of *n*-octyltriethoxysilane (mole %) used as starting trialkoxysilane is indicated. The arrows point to peaks which are characteristic of the (001) peak of pure C-S-H suggesting that 20% and 40% substituted materials are a mixture of C-S-H and 100% *n*-octyl calcium silicate hybrids.

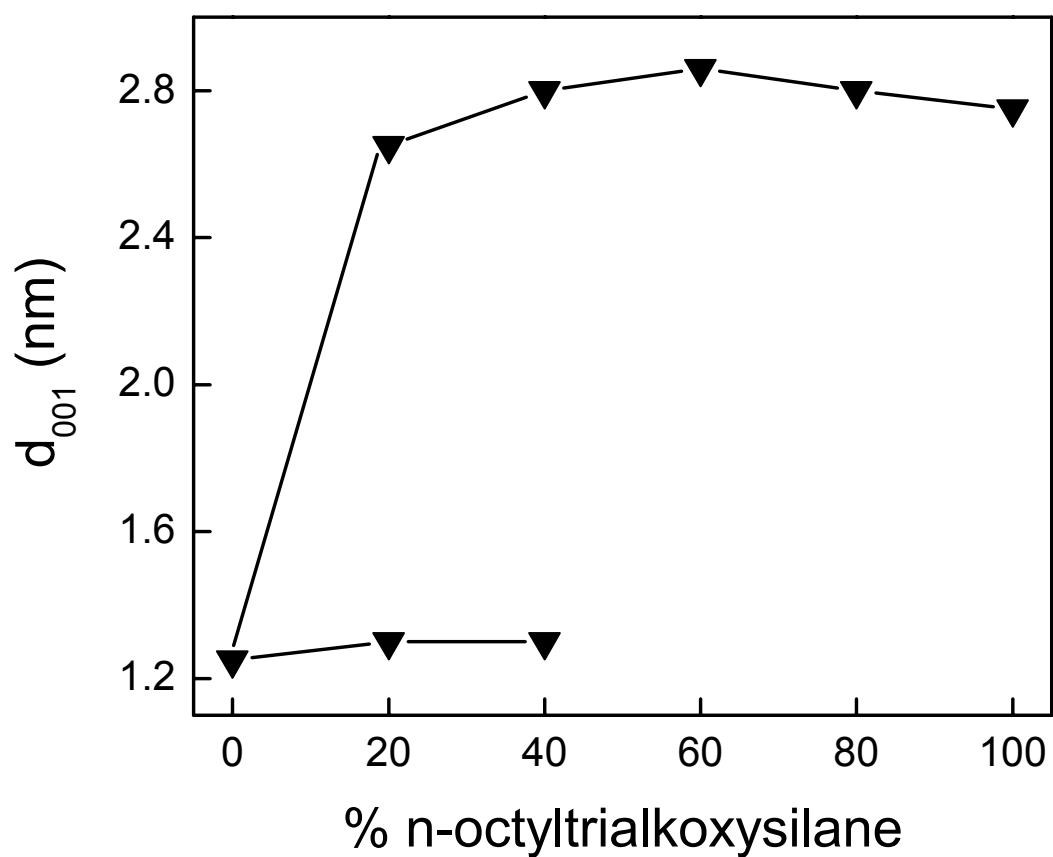

**Figure S2** Evolution of the basal distance ( $d_{001}$ ) with the *n*-octyltrialkoxysilane fraction (in mole %) in calcium silicate hybrids.

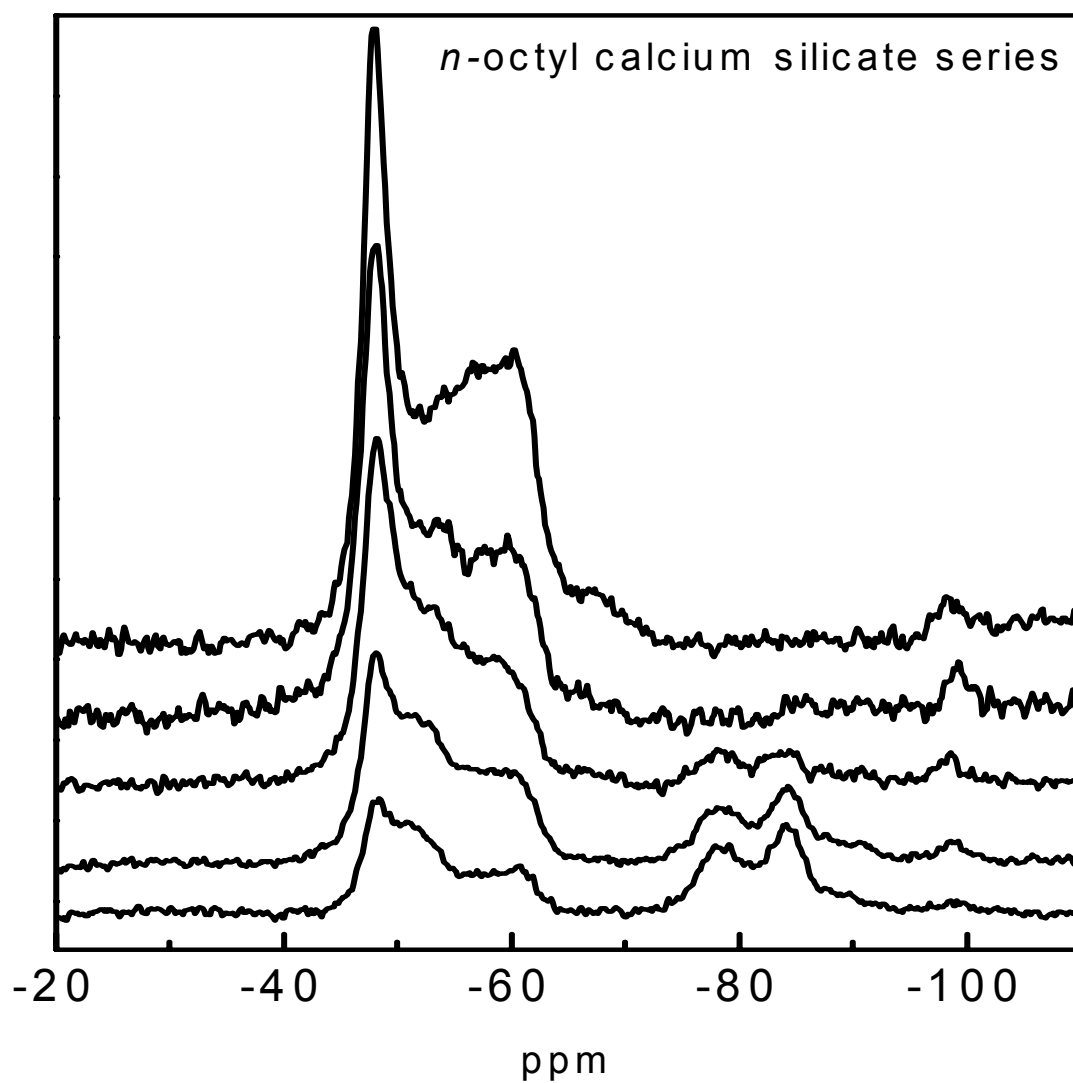

**Figure S3**  $^{29}\text{Si}$  CP-MAS NMR spectra of *n*-octyl calcium silicate hybrids. In this figure, the fraction of trialkoxysilane (in mole %) varies from 20 to 100% by 20% steps from the bottom to the top.

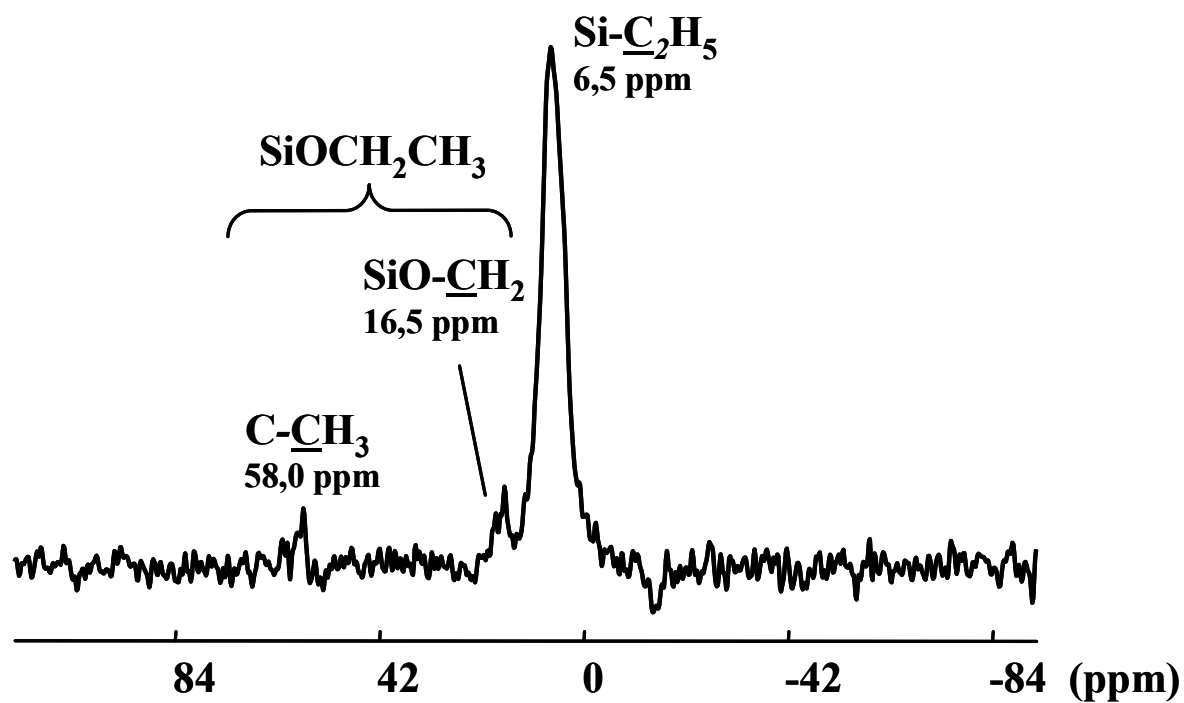

**Figure S4**  $^{13}\text{C}$  CP-MAS NMR spectrum of a deuterated hybrid made on a mixture of 40% ethyltriethoxysilane and 60 % TEOS.

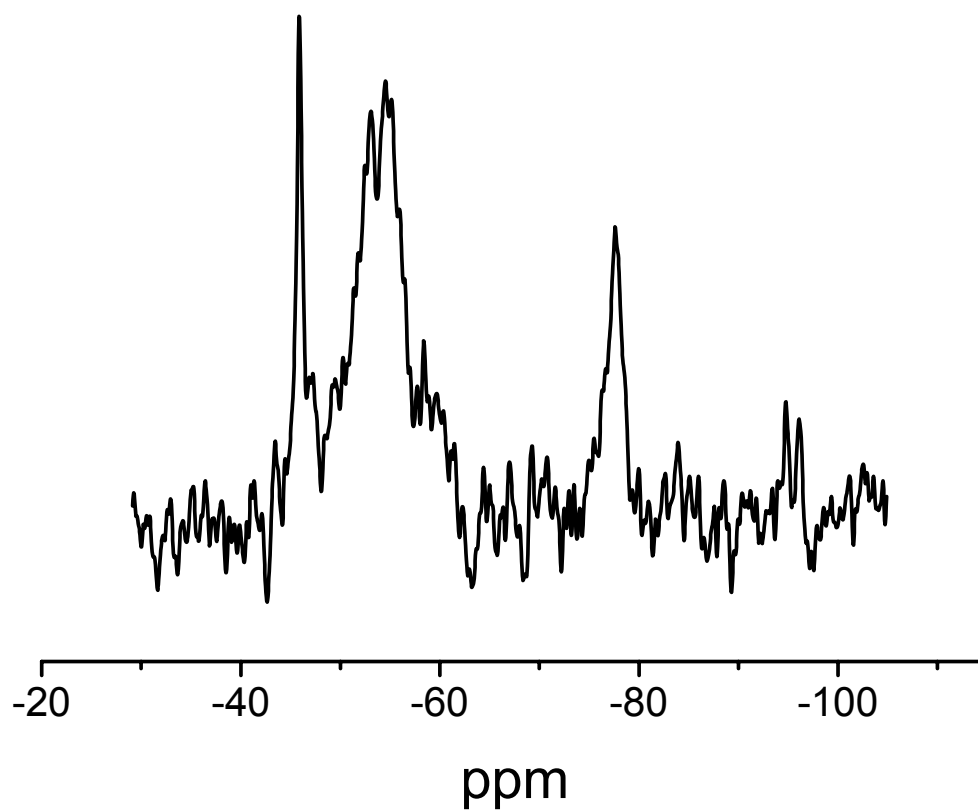

**Figure S5**  $^{29}\text{Si}$  CP-MAS NMR spectrum of a deuterated aminopropyl calcium silicate hybrid made on a mixture of 10% aminopropyltriethoxysilane and 60% TEOS.
